# Supplementary material for: Diagnosis of hepatic glycogen storage disease patients with overlapping clinical symptoms by massively parallel sequencing: a systematic review of literature
Source: PubMed Central journal article supplement (PMC7557034; doi:10.1186/s13023-020-01573-8), 2020-10-14
Supplement: 13023_2020_1573_MOESM1_ESM.pdf [file 13023_2020_1573_MOESM1_ESM.pdf]

**Diagnosis of hepatic Glycogen storage disease patients with overlapping clinical symptoms by massively parallel sequencing: a systematic review of literature**

Zahra Beyzaei PhD <sup>1</sup>, Bitra Geramizadeh MD <sup>1,2\*</sup>, Sara Karimzadeh MSc<sup>3</sup>

<sup>1</sup>Transplant Research Center, Shiraz University of Medical Sciences, Shiraz, Iran.

<sup>2</sup>Department of Pathology, Shiraz University of Medical Sciences, Shiraz, Iran.

<sup>3</sup>Shiraz Medical School Library, Shiraz University of Medical Sciences, Shiraz, Iran.

\*Corresponding Author:

Bitra Geramizadeh

Professor of Pathology,

Department of Pathology

Shiraz University of Medical Sciences, Shiraz, Iran

Postal Address: Khalili St., Research Tower, Seventh Floor, Research Shiraz Transplant Research Center (STRC), Shiraz, Iran

Call number: 98-71-36472915

E-mail address: geramib@gmail.com

**Supplementary Table 1. PRISMA 2009 Checklist**

| Section/topic             | #  | Checklist item                                                                                                                                                                                                                                                                                              | Reported on page # |
|---------------------------|----|-------------------------------------------------------------------------------------------------------------------------------------------------------------------------------------------------------------------------------------------------------------------------------------------------------------|--------------------|
| <b>TITLE</b>              |    |                                                                                                                                                                                                                                                                                                             |                    |
| Title                     | 1  | Identify the report as a systematic review, meta-analysis, or both.                                                                                                                                                                                                                                         | 1                  |
| <b>ABSTRACT</b>           |    |                                                                                                                                                                                                                                                                                                             |                    |
| Structured summary        | 2  | Provide a structured summary including, as applicable: background; objectives; data sources; study eligibility criteria, participants, and interventions; study appraisal and synthesis methods; results; limitations; conclusions and implications of key findings; systematic review registration number. | 2                  |
| <b>INTRODUCTION</b>       |    |                                                                                                                                                                                                                                                                                                             |                    |
| Rationale                 | 3  | Describe the rationale for the review in the context of what is already known.                                                                                                                                                                                                                              | 3-4                |
| Objectives                | 4  | Provide an explicit statement of questions being addressed with reference to participants, interventions, comparisons, outcomes, and study design (PICOS).                                                                                                                                                  | 4                  |
| <b>METHODS</b>            |    |                                                                                                                                                                                                                                                                                                             |                    |
| Protocol and registration | 5  | Indicate if a review protocol exists, if and where it can be accessed (e.g., Web address), and, if available, provide registration information including registration number.                                                                                                                               | 5                  |
| Eligibility criteria      | 6  | Specify study characteristics (e.g., PICOS, length of follow-up) and report characteristics (e.g., years considered, language, publication status) used as criteria for eligibility, giving rationale.                                                                                                      | 5-6                |
| Information sources       | 7  | Describe all information sources (e.g., databases with dates of coverage, contact with study authors to identify additional studies) in the search and date last searched.                                                                                                                                  | 5                  |
| Search                    | 8  | Present full electronic search strategy for at least one database, including any limits used, such that it could be repeated.                                                                                                                                                                               | Additional file 2  |
| Study selection           | 9  | State the process for selecting studies (i.e., screening, eligibility, included in systematic review, and, if applicable, included in the meta-analysis).                                                                                                                                                   | 5,6                |
| Data collection process   | 10 | Describe method of data extraction from reports (e.g., piloted forms, independently, in duplicate) and any processes for obtaining and confirming data from investigators.                                                                                                                                  | 6                  |
| Data items                | 11 | List and define all variables for which data were sought (e.g., PICOS, funding sources) and any assumptions and simplifications made.                                                                                                                                                                       | 7                  |

|                                    |    |                                                                                                                                                                                                                        |      |
|------------------------------------|----|------------------------------------------------------------------------------------------------------------------------------------------------------------------------------------------------------------------------|------|
| Risk of bias in individual studies | 12 | Describe methods used for assessing risk of bias of individual studies (including specification of whether this was done at the study or outcome level), and how this information is to be used in any data synthesis. | 6    |
| Summary measures                   | 13 | State the principal summary measures (e.g., risk ratio, difference in means).                                                                                                                                          | 7    |
| Synthesis of results               | 14 | Describe the methods of handling data and combining results of studies, if done, including measures of consistency (e.g., $I^2$ ) for each meta-analysis.                                                              | None |

| Section/topic                 | #  | Checklist item                                                                                                                                                                                           | Reported on page #   |
|-------------------------------|----|----------------------------------------------------------------------------------------------------------------------------------------------------------------------------------------------------------|----------------------|
| Risk of bias across studies   | 15 | Specify any assessment of risk of bias that may affect the cumulative evidence (e.g., publication bias, selective reporting within studies).                                                             | 6                    |
| Additional analyses           | 16 | Describe methods of additional analyses (e.g., sensitivity or subgroup analyses, meta-regression), if done, indicating which were pre-specified.                                                         | None                 |
| <b>RESULTS</b>                |    |                                                                                                                                                                                                          |                      |
| Study selection               | 17 | Give numbers of studies screened, assessed for eligibility, and included in the review, with reasons for exclusions at each stage, ideally with a flow diagram.                                          | 7, Figure 1          |
| Study characteristics         | 18 | For each study, present characteristics for which data were extracted (e.g., study size, PICOS, follow-up period) and provide the citations.                                                             | 7-9                  |
| Risk of bias within studies   | 19 | Present data on risk of bias of each study and, if available, any outcome level assessment (see item 12).                                                                                                | 7, Additional file 3 |
| Results of individual studies | 20 | For all outcomes considered (benefits or harms), present, for each study: (a) simple summary data for each intervention group (b) effect estimates and confidence intervals, ideally with a forest plot. | 7-9                  |
| Synthesis of results          | 21 | Present results of each meta-analysis done, including confidence intervals and measures of consistency.                                                                                                  | 7-9                  |
| Risk of bias across studies   | 22 | Present results of any assessment of risk of bias across studies (see Item 15).                                                                                                                          | None                 |
| Additional analysis           | 23 | Give results of additional analyses, if done (e.g., sensitivity or subgroup analyses, meta-regression [see Item 16]).                                                                                    | None                 |
| <b>DISCUSSION</b>             |    |                                                                                                                                                                                                          |                      |
| Summary of evidence           | 24 | Summarize the main findings including the strength of evidence for each main outcome; consider their relevance to key groups (e.g., healthcare providers, users, and policy makers).                     | 9, 11                |

|                |    |                                                                                                                                                               |    |
|----------------|----|---------------------------------------------------------------------------------------------------------------------------------------------------------------|----|
| Limitations    | 25 | Discuss limitations at study and outcome level (e.g., risk of bias), and at review-level (e.g., incomplete retrieval of identified research, reporting bias). | 11 |
| Conclusions    | 26 | Provide a general interpretation of the results in the context of other evidence, and implications for future research.                                       | 12 |
| <b>FUNDING</b> |    |                                                                                                                                                               |    |
| Funding        | 27 | Describe sources of funding for the systematic review and other support (e.g., supply of data); role of funders for the systematic review.                    | 12 |

**Supplementary Table 2.** Search strategy for MEDLINE/PubMed, EMBASE, Cochrane Library, Scopus and Web of Science Core Collection databases

|        |                                                                                                                                                                                                                                                                                                                                                                                                                                                                                                                                                                                                                                                                                                                                                                                                                                                                                                                                                                                                                                                                                                                                                                                                                                                                                                                                                                                                                                                                                                                                                                                               |        |
|--------|-----------------------------------------------------------------------------------------------------------------------------------------------------------------------------------------------------------------------------------------------------------------------------------------------------------------------------------------------------------------------------------------------------------------------------------------------------------------------------------------------------------------------------------------------------------------------------------------------------------------------------------------------------------------------------------------------------------------------------------------------------------------------------------------------------------------------------------------------------------------------------------------------------------------------------------------------------------------------------------------------------------------------------------------------------------------------------------------------------------------------------------------------------------------------------------------------------------------------------------------------------------------------------------------------------------------------------------------------------------------------------------------------------------------------------------------------------------------------------------------------------------------------------------------------------------------------------------------------|--------|
| Pubmed | <p>Search (((((((((((((((Next generation sequencing) OR whole exome sequencing) OR whole genome sequencing) OR targeted gene sequencing) OR Clinical exome sequencing) OR massively parallel sequencing) OR High Throughput Nucleotide Sequencing) OR Deep sequencing) OR High-Throughput DNA Sequencing)) OR "High-Throughput Nucleotide Sequencing"[Mesh]) OR "Whole Genome Sequencing"[Mesh]) OR "targeted gene sequencing "[Mesh]) OR "Whole Exome Sequencing"[Mesh])) AND (((((((((((((((((((Hepatorenal Glycogen Storage Disease) OR Glucosephosphatase deficiencies) OR glycogen storage disease type I) OR Von Gierke disease) OR glucose-6-phosphatase) OR glucose-6-phosphatase deficiency) OR Glucose-6-phosphate transporter) OR "G6PC") OR "SLC37A4") OR glycogen storage disease type III) OR "Cori disease") OR glycogen debranching enzyme) OR debrancher deficiency) OR "AGL gene") OR glycogen storage disease type IV) OR "Andersen disease") OR "GBE1") OR glycogen branching enzyme) OR Amylopectinosis) OR brancher deficiency) OR glycogen storage disease type VI) OR "liver glycogenphosphorylase") OR Hepatic Glycogen Phosphorylase Deficiency) OR "PYGL") OR "Hers' disease") OR "hepatic glycogen storage disease") OR "liver biopsy" OR "Glycogen Storage Disease Type IX")) OR (((((((("Glycogen Storage Disease Type I"[Mesh]) OR "Glucose-6-Phosphatase"[Mesh])) OR "Glycogen Storage Disease Type III"[Mesh]) OR "Glycogen Debranching Enzyme System"[Mesh]) OR "Glycogen Storage Disease Type IV"[Mesh]) OR "Glycogen Storage Disease Type VI"[Mesh]))</p> | 104    |
| Key 1  | <p>Search (((((((((((((((Next generation sequencing) OR whole exome sequencing) OR whole genome sequencing) OR targeted gene sequencing) OR Clinical exome sequencing) OR massively parallel</p>                                                                                                                                                                                                                                                                                                                                                                                                                                                                                                                                                                                                                                                                                                                                                                                                                                                                                                                                                                                                                                                                                                                                                                                                                                                                                                                                                                                              | 103355 |



KEY ( *massively AND parallel AND sequencing* ) OR TITLE-ABS-  
 KEY ( *high AND throughput AND nucleotide AND sequencing* ) OR TITLE-ABS-  
 KEY ( *deep AND sequencing* ) OR TITLE-ABS-KEY ( *high-  
 throughput AND dna AND sequencing* ) ) AND ( ( TITLE-ABS-  
 KEY ( *hepatorenal AND glycogen AND storage AND disease* ) OR TITLE-ABS-  
 KEY ( *glucosephosphatase AND deficiencies* ) OR TITLE-ABS-  
 KEY ( *glycogen AND storage AND disease AND type AND i* ) OR TITLE-ABS-  
 KEY ( *von AND gierke AND disease* ) OR TITLE-ABS-KEY ( *glucose-6-phosphatase* ) OR TITLE-  
 ABS-KEY ( *glucose-6-phosphatase AND deficiency* ) OR TITLE-ABS-KEY ( *glucose-6-  
 phosphate AND transporter* ) OR TITLE-ABS-KEY ( "G6PC" ) OR TITLE-ABS-  
 KEY ( "SLC37A4" ) OR TITLE-ABS-  
 KEY ( *glycogen AND storage AND disease AND type AND iii* ) OR TITLE-ABS-KEY ( "Cori  
 disease" ) OR TITLE-ABS-KEY ( *glycogen AND debranching AND enzyme* ) OR TITLE-ABS-  
 KEY ( *debrancher AND deficiency* ) OR TITLE-ABS-KEY ( "AGL gene" ) OR TITLE-ABS-  
 KEY ( *glycogen AND storage AND disease AND type AND iv* ) OR TITLE-ABS-KEY ( "Andersen  
 disease" ) OR TITLE-ABS-KEY ( "GBE1" ) OR TITLE-ABS-  
 KEY ( *glycogen AND branching AND enzyme* ) OR TITLE-ABS-KEY ( *amylopectinosis* ) OR TITLE-  
 ABS-KEY ( *brancher AND deficiency* ) OR TITLE-ABS-  
 KEY ( *glycogen AND storage AND disease AND type AND vi* ) OR TITLE-ABS-KEY ( "liver  
 glycogenphosphorylase" ) OR TITLE-ABS-  
 KEY ( *hepatic AND glycogen AND phosphorylase AND deficiency* ) OR TITLE-ABS-  
 KEY ( "PYGL" ) OR TITLE-ABS-KEY ( "Hers' disease" ) OR TITLE-ABS-KEY ( "hepatic glycogen  
 storage disease" ) OR TITLE-ABS-KEY ( "liver biopsy" ) **OR TITLE-ABS-KEY** ( "Glycogen Storage  
 Disease Type IX" ) ) )

|       |                                                                                                                                                                                                                                                                                                                                                                                                                                                                                                                                                                                                                                                                                                                                                                                                                                                                                                                                                                                                                                                                                                                                                                                                                                                                                                                                                                                                                                              |        |
|-------|----------------------------------------------------------------------------------------------------------------------------------------------------------------------------------------------------------------------------------------------------------------------------------------------------------------------------------------------------------------------------------------------------------------------------------------------------------------------------------------------------------------------------------------------------------------------------------------------------------------------------------------------------------------------------------------------------------------------------------------------------------------------------------------------------------------------------------------------------------------------------------------------------------------------------------------------------------------------------------------------------------------------------------------------------------------------------------------------------------------------------------------------------------------------------------------------------------------------------------------------------------------------------------------------------------------------------------------------------------------------------------------------------------------------------------------------|--------|
| Key 1 | ( TITLE-ABS-KEY ( <i>next</i> AND <i>generation</i> AND <i>sequencing</i> ) OR TITLE-ABS-KEY ( <i>whole</i> AND <i>exome</i> AND <i>sequencing</i> ) OR TITLE-ABS-KEY ( <i>whole</i> AND <i>genome</i> AND <i>sequencing</i> ) OR TITLE-ABS-KEY ( <i>targeted</i> AND <i>gene</i> AND <i>sequencing</i> ) OR TITLE-ABS-KEY ( <i>clinical</i> AND <i>exome</i> AND <i>sequencing</i> ) OR TITLE-ABS-KEY ( <i>massively</i> AND <i>parallel</i> AND <i>sequencing</i> ) OR TITLE-ABS-KEY ( <i>high</i> AND <i>throughput</i> AND <i>nucleotide</i> AND <i>sequencing</i> ) OR TITLE-ABS-KEY ( <i>deep</i> AND <i>sequencing</i> ) OR TITLE-ABS-KEY ( <i>high-throughput</i> AND <i>dna</i> AND <i>sequencing</i> ) )                                                                                                                                                                                                                                                                                                                                                                                                                                                                                                                                                                                                                                                                                                                           | 125042 |
| Key 2 | ( TITLE-ABS-KEY ( <i>hepatorenal</i> AND <i>glycogen</i> AND <i>storage</i> AND <i>disease</i> ) OR TITLE-ABS-KEY ( <i>glucosephosphatase</i> AND <i>deficiencies</i> ) OR TITLE-ABS-KEY ( <i>glycogen</i> AND <i>storage</i> AND <i>disease</i> AND <i>type</i> AND <i>i</i> ) OR TITLE-ABS-KEY ( <i>von</i> AND <i>gierke</i> AND <i>disease</i> ) OR TITLE-ABS-KEY ( <i>glucose-6-phosphatase</i> ) OR TITLE-ABS-KEY ( <i>glucose-6-phosphatase</i> AND <i>deficiency</i> ) OR TITLE-ABS-KEY ( <i>glucose-6-phosphate</i> AND <i>transporter</i> ) OR TITLE-ABS-KEY ( "G6PC" ) OR TITLE-ABS-KEY ( "SLC37A4" ) OR TITLE-ABS-KEY ( <i>glycogen</i> AND <i>storage</i> AND <i>disease</i> AND <i>type</i> AND <i>iii</i> ) OR TITLE-ABS-KEY ( "Cori disease" ) OR TITLE-ABS-KEY ( <i>glycogen</i> AND <i>debranching</i> AND <i>enzyme</i> ) OR TITLE-ABS-KEY ( <i>debrancher</i> AND <i>deficiency</i> ) OR TITLE-ABS-KEY ( "AGL gene" ) OR TITLE-ABS-KEY ( <i>glycogen</i> AND <i>storage</i> AND <i>disease</i> AND <i>type</i> AND <i>iv</i> ) OR TITLE-ABS-KEY ( "Andersen disease" ) OR TITLE-ABS-KEY ( "GBE1" ) OR TITLE-ABS-KEY ( <i>glycogen</i> AND <i>branching</i> AND <i>enzyme</i> ) OR TITLE-ABS-KEY ( <i>amylopectinosis</i> ) OR TITLE-ABS-KEY ( <i>brancher</i> AND <i>deficiency</i> ) OR TITLE-ABS-KEY ( <i>glycogen</i> AND <i>storage</i> AND <i>disease</i> AND <i>type</i> AND <i>vi</i> ) OR TITLE-ABS-KEY ( "liver | 65977  |



|  |                                                                                                                                                                                                                                                                                                                                 |  |
|--|---------------------------------------------------------------------------------------------------------------------------------------------------------------------------------------------------------------------------------------------------------------------------------------------------------------------------------|--|
|  | <i>glycogenphosphorylase" ) OR TITLE-ABS-KEY ( hepatic AND glycogen AND phosphorylase AND deficiency ) OR TITLE-ABS-KEY ( "PYGL" ) OR TITLE-ABS-KEY ( "Hers' disease" ) OR TITLE-ABS-KEY ( "hepatic glycogen storage disease" ) OR TITLE-ABS-KEY ( "liver biopsy" ) OR TITLE-ABS-KEY ( "Glycogen Storage Disease Type IX"</i> ) |  |
|--|---------------------------------------------------------------------------------------------------------------------------------------------------------------------------------------------------------------------------------------------------------------------------------------------------------------------------------|--|

|        |                                                                                                                                                                                                                                                                                                                                                                                                                                                                                                                                                                                                                                                                                                                                                                                                                                                                                                                                                                                      |        |
|--------|--------------------------------------------------------------------------------------------------------------------------------------------------------------------------------------------------------------------------------------------------------------------------------------------------------------------------------------------------------------------------------------------------------------------------------------------------------------------------------------------------------------------------------------------------------------------------------------------------------------------------------------------------------------------------------------------------------------------------------------------------------------------------------------------------------------------------------------------------------------------------------------------------------------------------------------------------------------------------------------|--------|
| Embase | (next AND generation AND sequencing OR (whole AND exome AND sequencing) OR (whole AND genome AND sequencing) OR (targeted AND gene AND sequencing) OR (clinical AND exome AND sequencing) OR (massively AND parallel AND sequencing) OR (high AND throughput AND nucleotide AND sequencing) OR (deep AND sequencing) OR ('high throughput' AND dna AND sequencing)) AND (hepatorenal AND glycogen AND storage AND disease OR (glucosephosphatase AND deficiencies) OR (glycogen AND storage AND disease AND type AND i) OR (von AND gierke AND disease) OR 'glucose 6 phosphatase' OR (glycogen AND storage AND disease AND type AND iii) OR (cori AND disease) OR (glycogen AND debranching AND enzyme) OR (debrancher AND deficiency) OR (glycogen AND storage AND disease AND type AND iv) OR (andersen AND disease) OR amylopectinosis OR (brancher AND deficiency) OR (glycogen AND storage AND disease AND type AND vi) OR (Glycogen AND Storage AND Disease AND Type AND IX)) | 941    |
| Key1   | 'next generation sequencing technology' OR 'whole exome sequencing' OR (whole AND genome AND sequencing) OR (targeted AND gene AND sequencing) OR 'clinical exome sequencing' OR (massively AND parallel AND sequencing) OR (high AND throughput AND nucleotide AND sequencing) OR (deep AND sequencing) OR ('high throughput' AND dna AND sequencing)                                                                                                                                                                                                                                                                                                                                                                                                                                                                                                                                                                                                                               | 112214 |

|      |                                                                                                                                                                                                                                                                                                                                                                                                                                                                                                                                                                                                                                                                                                                                                                                                                                                                                                                                                                     |        |
|------|---------------------------------------------------------------------------------------------------------------------------------------------------------------------------------------------------------------------------------------------------------------------------------------------------------------------------------------------------------------------------------------------------------------------------------------------------------------------------------------------------------------------------------------------------------------------------------------------------------------------------------------------------------------------------------------------------------------------------------------------------------------------------------------------------------------------------------------------------------------------------------------------------------------------------------------------------------------------|--------|
| Key2 | <p>hepatorenal AND glycogen AND storage AND disease OR (glucosephosphatase AND deficiencies) OR (glycogen AND storage AND disease AND type AND i) OR (von AND gierke AND disease) OR 'glucose 6 phosphatase' OR ('glucose 6 phosphatase' AND deficiency) OR ('glucose 6 phosphate' AND transporter) OR 'g6pc' OR 'slc37a4' OR (glycogen AND storage AND disease AND type AND iii) OR (cori AND disease) OR (glycogen AND debranching AND enzyme) OR (debrancher AND deficiency) OR 'agl gene' OR (glycogen AND storage AND disease AND type AND iv) OR (andersen AND disease) OR (glycogen AND branching AND enzyme) OR amylopectinosis OR (brancher AND deficiency) OR (glycogen AND storage AND disease AND type AND vi) OR (liver AND glycogenphosphorylase) OR (hepatic AND glycogen AND phosphorylase AND deficiency) OR (hers AND disease) OR (hepatic AND glycogen AND storage AND disease) OR (liver AND biopsy) OR (Glycogen Storage Disease Type IX))</p> | 143294 |
|------|---------------------------------------------------------------------------------------------------------------------------------------------------------------------------------------------------------------------------------------------------------------------------------------------------------------------------------------------------------------------------------------------------------------------------------------------------------------------------------------------------------------------------------------------------------------------------------------------------------------------------------------------------------------------------------------------------------------------------------------------------------------------------------------------------------------------------------------------------------------------------------------------------------------------------------------------------------------------|--------|

|     |                                                                                                                                                                                                                                                                                                                                                                                                                                                           |     |
|-----|-----------------------------------------------------------------------------------------------------------------------------------------------------------------------------------------------------------------------------------------------------------------------------------------------------------------------------------------------------------------------------------------------------------------------------------------------------------|-----|
| ISI | <p><b>(TOPIC: (Next generation sequencing) OR TOPIC: (whole exome sequencing) OR TOPIC: (whole genome sequencing) OR TOPIC: (targeted gene sequencing) OR TOPIC: (Clinical exome sequencing) OR TOPIC: (massively parallel sequencing) OR TOPIC: (High Throughput Nucleotide Sequencing) OR TOPIC: (Deep sequencing) OR TOPIC: (High-Throughput DNA Sequencing)</b></p> <p>Indexes=SCI-EXPANDED, SSCI, CPCI-S, CPCI-SSH, ESCI Timespan=All years) AND</p> | 271 |
|-----|-----------------------------------------------------------------------------------------------------------------------------------------------------------------------------------------------------------------------------------------------------------------------------------------------------------------------------------------------------------------------------------------------------------------------------------------------------------|-----|

|       |                                                                                                                                                                                                                                                                                                                                                                                                                                                                                                                                                                                                                                                                                                                                                                                                                                                                                                                                                                                                                                                                                   |        |
|-------|-----------------------------------------------------------------------------------------------------------------------------------------------------------------------------------------------------------------------------------------------------------------------------------------------------------------------------------------------------------------------------------------------------------------------------------------------------------------------------------------------------------------------------------------------------------------------------------------------------------------------------------------------------------------------------------------------------------------------------------------------------------------------------------------------------------------------------------------------------------------------------------------------------------------------------------------------------------------------------------------------------------------------------------------------------------------------------------|--------|
|       | <p><b>(TOPIC: (Hepatorenal Glycogen Storage Disease) OR TOPIC: (Glucosephosphatase deficiencies) OR TOPIC: (glycogen storage disease type I) OR TOPIC: (Von Gierke disease) OR TOPIC: (glucose-6-phosphatase) OR TOPIC: (glucose-6-phosphatase deficiency) OR TOPIC: (Glucose-6-phosphate transporter) OR TOPIC: ("G6PC") OR TOPIC: ("SLC37A4") OR TOPIC: (glycogen storage disease type III) OR TOPIC: (Cori disease) OR TOPIC: (glycogen debranching enzyme) OR TOPIC: (debrancher deficiency) OR TOPIC: ("AGL gene") OR TOPIC: (glycogen storage disease type IV) OR TOPIC: (Andersen disease) OR TOPIC: (glycogen branching enzyme) OR TOPIC: (Amylopectinosis) OR TOPIC: (brancher deficiency) OR TOPIC: (glycogen storage disease type VI) OR TOPIC: (liver glycogenphosphorylase) OR TOPIC: (Hepatic Glycogen Phosphorylase Deficiency) OR TOPIC: (Hers' disease) OR TOPIC: (hepatic glycogen storage disease) OR TOPIC: (liver biopsy) OR TOPIC: (Glycogen Storage Disease Type IX)</b></p> <p>Indexes=SCI-EXPANDED, SSCI, CPCI-S, CPCI-SSH, ESCI Timespan=All years)</p> |        |
| Key 1 | <p><b>(TOPIC: (Next generation sequencing) OR TOPIC: (whole exome sequencing) OR TOPIC: (whole genome sequencing) OR TOPIC: (targeted gene sequencing) OR TOPIC: (Clinical exome sequencing) OR TOPIC: (massively parallel sequencing) OR TOPIC: (High Throughput Nucleotide Sequencing) OR TOPIC: (Deep sequencing) OR TOPIC: (High-Throughput DNA Sequencing)</b></p> <p>Indexes=SCI-EXPANDED, SSCI, CPCI-S, CPCI-SSH, ESCI Timespan=All years)</p>                                                                                                                                                                                                                                                                                                                                                                                                                                                                                                                                                                                                                             | 208264 |
| Key 2 | <p><b>(TOPIC: (Hepatorenal Glycogen Storage Disease) OR TOPIC: (Glucosephosphatase deficiencies) OR TOPIC: (glycogen storage disease type I) OR TOPIC: (Von Gierke disease) OR TOPIC: (glucose-6-phosphatase) OR TOPIC: (glucose-6-phosphatase deficiency) OR TOPIC: (Glucose-6-phosphate</b></p>                                                                                                                                                                                                                                                                                                                                                                                                                                                                                                                                                                                                                                                                                                                                                                                 | 43539  |

|  |                                                                                                                                                                                                                                                                                                                                                                                                                                                                                                                                                                                                                                                                                                                                                                                                                                                                                                                              |  |
|--|------------------------------------------------------------------------------------------------------------------------------------------------------------------------------------------------------------------------------------------------------------------------------------------------------------------------------------------------------------------------------------------------------------------------------------------------------------------------------------------------------------------------------------------------------------------------------------------------------------------------------------------------------------------------------------------------------------------------------------------------------------------------------------------------------------------------------------------------------------------------------------------------------------------------------|--|
|  | <p>transporter) <b>OR TOPIC:</b> ("G6PC") <b>OR TOPIC:</b> ("SLC37A4") <b>OR TOPIC:</b> (glycogen storage disease type III) <b>OR TOPIC:</b> (Cori disease) <b>OR TOPIC:</b> (glycogen debranching enzyme) <b>OR TOPIC:</b> (debrancher deficiency) <b>OR TOPIC:</b> ("AGL gene") <b>OR TOPIC:</b> (glycogen storage disease type IV) <b>OR TOPIC:</b> (Andersen disease) <b>OR TOPIC:</b> (glycogen branching enzyme) <b>OR TOPIC:</b> (Amylopectinosis) <b>OR TOPIC:</b> (brancher deficiency) <b>OR TOPIC:</b> (glycogen storage disease type VI) <b>OR TOPIC:</b> (liver glycogen phosphorylase) <b>OR TOPIC:</b> (Hepatic Glycogen Phosphorylase Deficiency) <b>OR TOPIC:</b> (Hers' disease) <b>OR TOPIC:</b> (hepatic glycogen storage disease) <b>OR TOPIC:</b> (liver biopsy) <b>OR TOPIC:</b> (Glycogen Storage Disease Type IX)</p> <p>Indexes=SCI-EXPANDED, SSCI, CPCI-S, CPCI-SSH, ESCI Timespan=All years)</p> |  |
|--|------------------------------------------------------------------------------------------------------------------------------------------------------------------------------------------------------------------------------------------------------------------------------------------------------------------------------------------------------------------------------------------------------------------------------------------------------------------------------------------------------------------------------------------------------------------------------------------------------------------------------------------------------------------------------------------------------------------------------------------------------------------------------------------------------------------------------------------------------------------------------------------------------------------------------|--|

|          |                                                                                                                                                                                                                                                                                                                                                 |   |
|----------|-------------------------------------------------------------------------------------------------------------------------------------------------------------------------------------------------------------------------------------------------------------------------------------------------------------------------------------------------|---|
| Cochrane | "next generation sequencing" in Title Abstract Keyword <b>OR</b> whole exome sequencing in Title Abstract Keyword <b>OR</b> whole genome sequencing in Title Abstract Keyword <b>OR</b> targeted gene sequencing in Title Abstract Keyword <b>OR</b> Clinical exome sequencing in Title Abstract Keyword - (Word variations have been searched) | 6 |
|          | "next generation sequencing" in Title Abstract Keyword <b>AND</b> Hepatorenal Glycogen Storage Disease in Title Abstract Keyword                                                                                                                                                                                                                | 0 |
|          | "next generation sequencing" in Title Abstract Keyword <b>AND</b> Von Gierke disease in Title Abstract Keyword                                                                                                                                                                                                                                  | 0 |

**Supplementary Table 3.** Quality assessment scores according to the NHLBI Quality Assessment Tool for Observational Cohort, Cross-Sectional and Case series Studies for each reviewer.

**Reviewer 1:**

| Study                              | Q1  | Q2  | Q3  | Q4  | Q5 | Q6  | Q7 | Q8 | Q9  | Q10 | Q11 | Q12 | Q13 | Q14 | Quality Rating |
|------------------------------------|-----|-----|-----|-----|----|-----|----|----|-----|-----|-----|-----|-----|-----|----------------|
| <b>Yang et al. 2019</b>            | YES | YES | NO  | YES | NO | NO  | NA | NA | YES | NA  | YES | NR  | YES | NR  | POOR           |
| <b>Tong et al. 2018</b>            | YES | YES | YES | YES | NO | YES | NA | NA | NR  | NA  | YES | YES | YES | YES | GOOD           |
| <b>Zhang et al. 2017</b>           | YES | YES | YES | YES | NO | NO  | NA | NA | YES | NA  | YES | YES | YES | YES | GOOD           |
| <b>Skakik et al. 2017</b>          | YES | YES | YES | YES | NO | YES | NA | NA | YES | NA  | YES | NR  | YES | YES | GOOD           |
| <b>Choi et al. 2017</b>            | YES | YES | NO  | YES | NO | NO  | NA | NA | YES | NA  | YES | NR  | YES | NR  | POOR           |
| <b>Vega et al. 2016</b>            | YES | YES | YES | YES | NO | YES | NA | NA | YES | NA  | YES | NO  | YES | YES | GOOD           |
| <b>Wang et al. 2016</b>            | YES | YES | YES | YES | NO | NO  | NA | NA | YES | NA  | YES | NO  | YES | NR  | FAIR           |
| <b>Rousseau-Nepton et al. 2015</b> | YES | YES | NO  | YES | NO | NO  | NA | NA | YES | NA  | YES | NR  | YES | NR  | POOR           |
| <b>Fahiminiya 2014</b>             | YES | YES | NO  | YES | NO | NO  | NA | NA | YES | NA  | YES | NR  | YES | YES | FAIR           |
| <b>Roscher et al. 2014</b>         | YES | YES | YES | YES | NO | YES | NA | NA | NR  | NA  | YES | NR  | YES | NR  | FAIR           |
| <b>Wang et al. 2013</b>            | YES | YES | YES | YES | NO | NO  | NA | NA | YES | NA  | YES | NO  | YES | YES | FAIR           |

*NHLBI* National Heart, Lung, and Blood Institute; *CD* cannot be determined; *NA* not applicable; *NR* not reported;

“Continue Table 3”

Reviewer 2:

| Study                              | Q1  | Q2  | Q3  | Q4  | Q5 | Q6  | Q7 | Q8 | Q9  | Q10 | Q11 | Q12 | Q13 | Q14 | Quality Rating |
|------------------------------------|-----|-----|-----|-----|----|-----|----|----|-----|-----|-----|-----|-----|-----|----------------|
| <b>Yang et al. 2019</b>            | YES | YES | YES | YES | NO | NO  | NA | NA | YES | NA  | YES | NR  | YES | NR  | FAIR           |
| <b>Tong et al. 2018</b>            | YES | YES | YES | YES | NO | YES | NA | NA | NR  | NA  | YES | YES | YES | YES | GOOD           |
| <b>Zhang et al. 2017</b>           | YES | YES | YES | YES | NO | NO  | NA | NA | YES | NA  | YES | YES | YES | YES | GOOD           |
| <b>Skakik et al. 2017</b>          | YES | YES | YES | YES | NO | YES | NA | NA | YES | NA  | YES | NR  | YES | YES | GOOD           |
| <b>Choi et al. 2017</b>            | YES | YES | NO  | YES | NO | NO  | NA | NA | YES | NA  | YES | NR  | YES | NR  | POOR           |
| <b>Vega et al. 2016</b>            | YES | YES | YES | YES | NO | YES | NA | NA | YES | NA  | YES | NO  | YES | YES | GOOD           |
| <b>Wang et al. 2016</b>            | YES | YES | YES | YES | NO | NO  | NA | NA | YES | NA  | YES | NO  | YES | NR  | FAIR           |
| <b>Rousseau-Nepton et al. 2015</b> | YES | YES | NO  | YES | NO | NO  | NA | NA | YES | NA  | YES | NR  | YES | NR  | POOR           |
| <b>Fahiminiya 2014</b>             | YES | YES | YES | YES | NO | NO  | NA | NA | YES | NA  | YES | NR  | YES | YES | GOOD           |
| <b>Roscher et al. 2014</b>         | YES | YES | YES | YES | NO | YES | NA | NA | NR  | NA  | YES | NR  | YES | NR  | FAIR           |
| <b>Wang et al. 2013</b>            | YES | YES | YES | YES | NO | NO  | NA | NA | YES | NA  | YES | NO  | YES | YES | FAIR           |

*NHLBI* National Heart, Lung, and Blood Institute; *CD* cannot be determined; *NA* not applicable; *NR* not reported;
